# Supplementary material for: Diversity and Genome Analysis of Australian and Global Oilseed Brassica napus L. Germplasm Using Transcriptomics and Whole Genome Re-sequencing
Source: Front Plant Sci. 2018 Apr 19;9:508. doi: 10.3389/fpls.2018.00508 (PMC5917405; doi:10.3389/fpls.2018.00508)
Supplement: TABLE S4 — Size distribution of SVs. [file Table_4.XLSX]

## Sheet: Deletions
Size (bp)	Frequency
50-150	7595
151-250	547
251-350	358
351-450	165
451-550	147
551-650	170
651-750	135
751-850	111
851-950	104
951-1050	98
1051-1150	68
1151-1250	63
1251-1350	57
1351-1450	59
1451-1550	54
1551-1650	33
1651-1750	41
1751-1850	57
1851-1950	38
1951-2050	37
2051-2150	30
2151-2250	40
2251-2350	25
2351-2450	40
2451-2550	30
2551-2650	24
2651-2750	24
2751-2850	19
2851-2950	24
2951-3050	29
3051-3150	21
3151-3250	23
3251-3350	27
3351-3450	12
3451-3550	31
3551-3650	17
3651-3750	23
3751-3850	21
3851-3950	26
3951-4050	16
4051-4150	12
4151-4250	14
4251-4350	11
4351-4450	16
4451-4550	17
4551-4650	14
4651-4750	24
4751-4850	22
4851-4950	21
4951-5050	22
5051-5150	15
5151-5250	14
5251-5350	22
5351-5450	16
5451-5550	16
5551-5650	15
5651-5750	10
5751-5850	8
5851-5950	8
5951-6050	15
6051-6150	8
6151-6250	10
6251-6350	13
6351-6450	11
6451-6550	7
6551-6650	6
6651-6750	16
6751-6850	6
6851-6950	4
6951-7050	7
7051-7150	5
7151-7250	6
7251-7350	2
7351-7450	6
7451-7550	3
7551-7650	7
7651-7750	5
7751-7850	4
7851-7950	4
7951-8050	4
8051-8150	1
8151-8250	4
8251-8350	1
8351-8450	4
8451-8550	5
8551-8650	3
8651-8750	1
8751-8850	2
8851-8950	0
8951-9050	1
9051-9150	1
9151-9250	3
9251-9350	2
9351-9450	1
9451-9550	6
9551-9650	2
9651-9750	0
9751-9850	2
9851-9950	0
9951-10050	2
10051-10150	3
10151-10250	1
10251-10350	1
10351-10450	1
10451-10550	2
10551-10650	5
10651-10750	1
10751-10850	0
10851-10950	2
10951-11050	2
11051-11150	1
11151-11250	1
11251-11350	0
11351-11450	1
11451-11550	0
11551-11650	1
11651-11750	1
11751-11850	0
11851-11950	0
11951-12050	0
12051-12150	0
12151-12250	0
12251-12350	0
12351-12450	0
12451-12550	1
12551-12650	3
12651-12750	1
12751-12850	1
12851-12950	2
12951-13050	0
13051-13150	0
13151-13250	2
13251-13350	1
13351-13450	1
13451-13550	0
13551-13650	0
13651-13750	2
13751-13850	2
13851-13950	2
13951-14050	1
14051-14150	0
14151-14250	0
14251-14350	1
14351-14450	2
14451-14550	0
14551-14650	0
14651-14750	0
14751-14850	0
14851-14950	0
14951-15050	2
15051-15150	1
15151-15250	1
15251-15350	0
15351-15450	1

## Sheet: Insertions
Size (bp)	Frequency
50-60	592
61-70	419
71-80	365
81-90	288
91-100	259
101-110	200
111-120	217
121-130	200
131-140	16
